# Supplementary figures and images for: Role of ferroptosis-associated genes in ankylosing spondylitis and immune cell infiltration
Source: Frontiers journal article supplement (doi:10.3389/fgene.2022.948290), 2022-11-11

Before

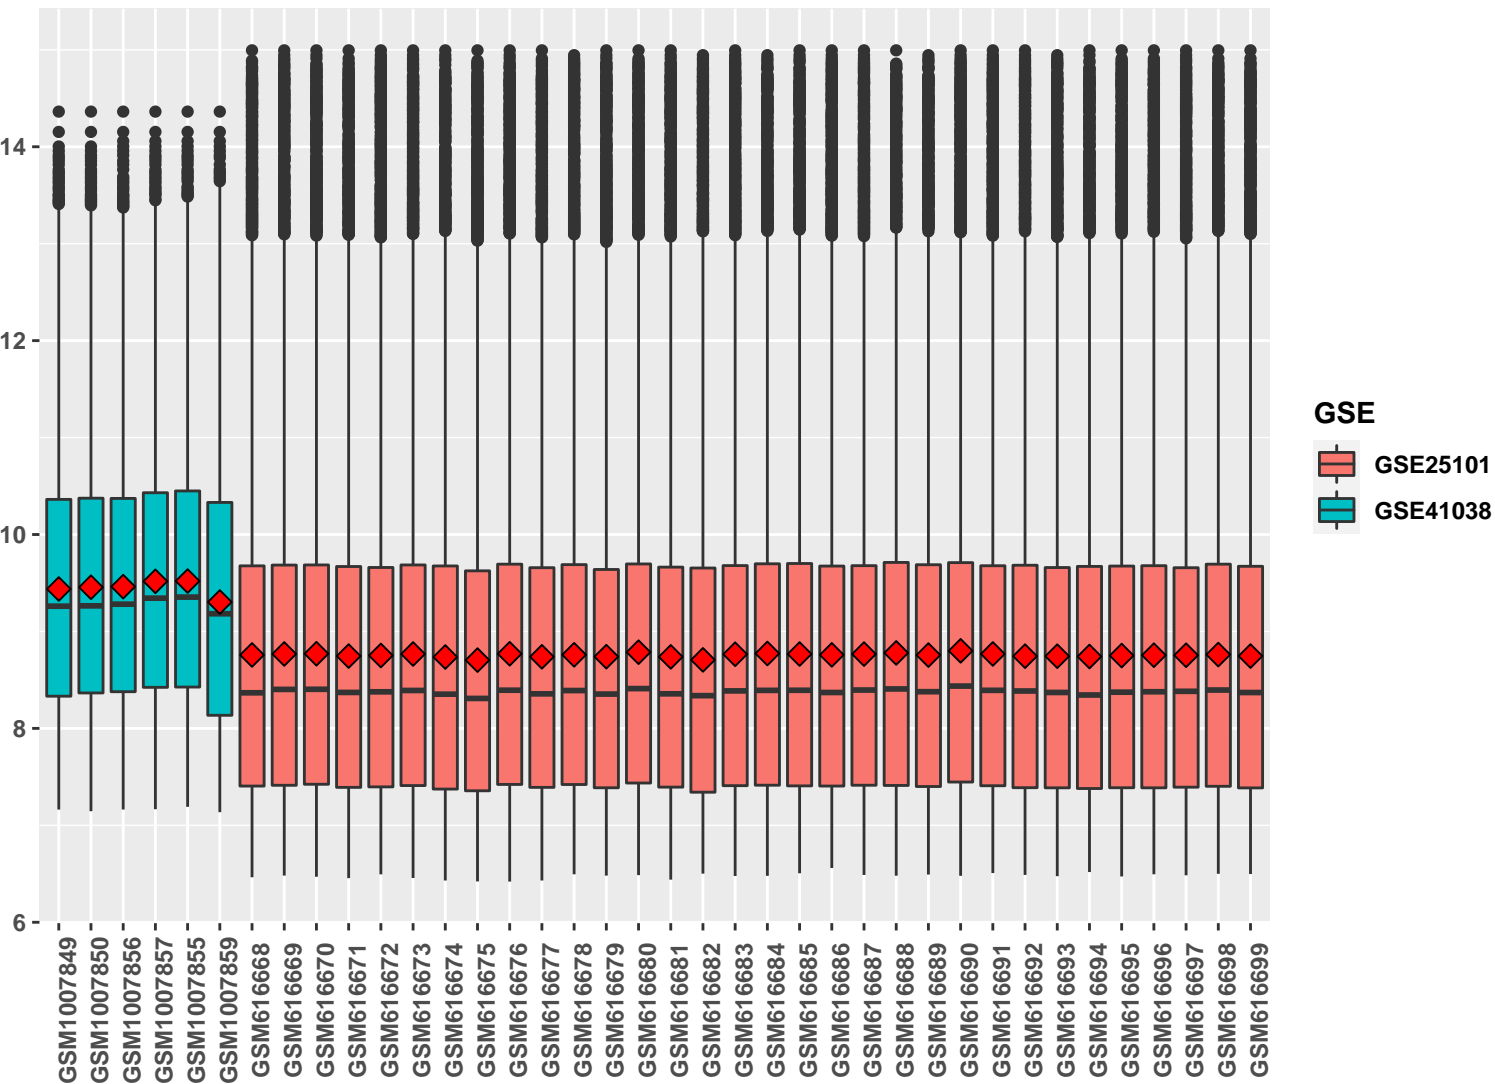

Supplement: Data_Sheet_2.ZIP [file Data_Sheet_2.ZIP]

After

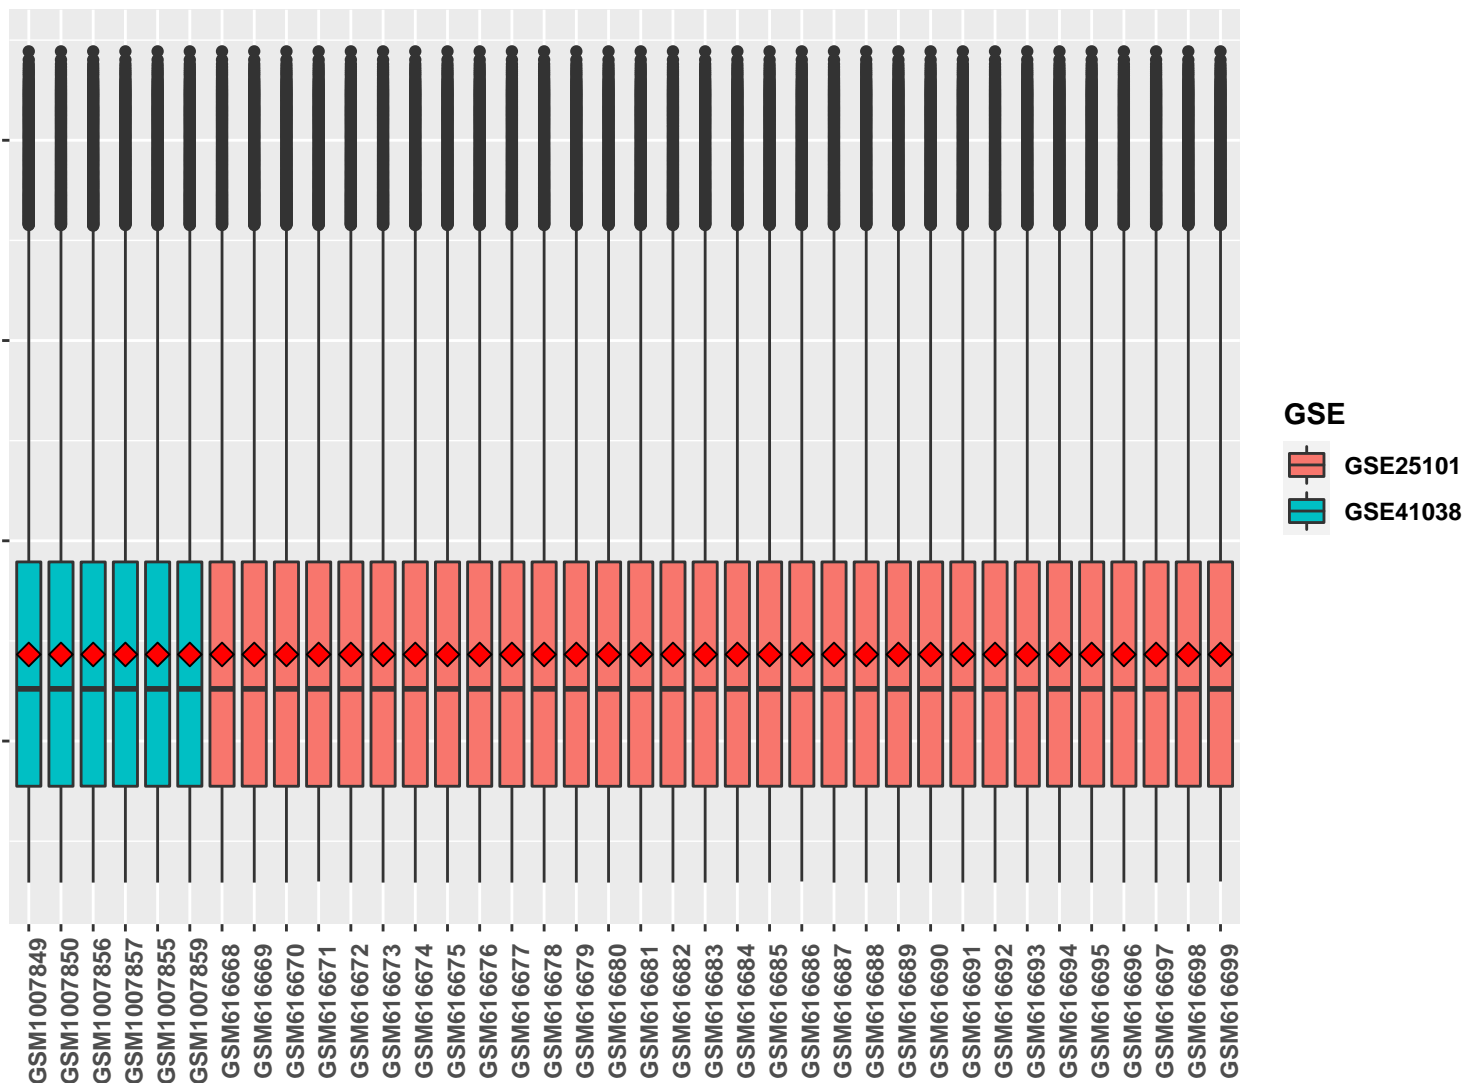

Supplement: Data_Sheet_2.ZIP [file Data_Sheet_2.ZIP]
